# Supplementary material for: circTNFRSF21, a newly identified circular RNA promotes endometrial carcinoma pathogenesis through regulating miR-1227-MAPK13/ATF2 axis
Source: PubMed Central journal article supplement (PMC7202486; doi:10.18632/aging.103037), 2020-04-16
Supplement: aging-12-103037-s001..pdf [file aging-12-103037-s001..pdf]

## SUPPLEMENTARY TABLE

**Supplementary Table 1. Primers used in this study.**

|                      |                                                 |
|----------------------|-------------------------------------------------|
| MAPK13sg1-F          | caccgTCCAGGAGCCCAATGACCTG                       |
| MAPK13sg2-F          | caccgACAGCTCGGCCATCGACAAG                       |
| MAPK13sg1-R          | aaacCAGGTCATTGGGCTCCTGGAc                       |
| MAPK13sg2-R          | aaacCTTGTCGATGGCCGAGCTGTc                       |
| TNFRSF21sg1-F        | caccgACCTTTGGGAACATAAGTGG                       |
| TNFRSF21sg2-F        | caccgACTTGTCACAGGTTAGCACC                       |
| TNFRSF21sg1-R        | aaacCCAATTATGTTCCCAAAGGTc                       |
| TNFRSF21sg2-R        | aaacGGTGCTAACCTGTGACAAGTc                       |
| TNFRSF21 exon6-F     | CCTGACCTGCTGTAGAACATAG                          |
| TNFRSF21 exon6-R     | CTCCAGCCCAAGCATATTAG                            |
| Circ_TNFRSF21-F      | GACATAGGTTCTGCTGGACAC                           |
| Circ_TNFRSF21-R      | CGCCCATCAAGGGCCCCAAG                            |
| qRT-MAPK13-F         | TGAGCCGACCCCTTCAATC                             |
| qRT-MAPK13-R         | AGCCCAATGACGTTCTCATGC                           |
| Mut-Circ_TNFRSF21-F1 | GAATCTCATTtagcATACCGCCATGTTGACC                 |
| Mut-Circ_TNFRSF21-R1 | GAGGCCTTCTGTTCTGGC                              |
| Mut-Circ_TNFRSF21-F2 | ACAACGTCTGgaatcACTCCCGTCTTCTCCAAG               |
| Mut-Circ_TNFRSF21-R2 | CTGTCTCCTTGGTCCCCG                              |
| Mut-Circ_TNFRSF21-F3 | ACCTTCCCCCTtactAGCCATCTTTCCAAG                  |
| Mut-Circ_TNFRSF21-R3 | GAGGTGGAAGCTGGAAGAAAG                           |
| Mut-MAPK13-3'UTR-F   | TGGAGTTCA GgaatcCAATTACATCTTACTGCAAACCTCAGCCTCC |
| Mut-MAPK13-3'UTR-R   | GCCCCGGTGAAGAGGCCA                              |
| MAPK13 3'UTR-F       | gggcacagtgggtctcaaat                            |
| MAPK13 3'UTR-R       | gctataatcccagcactttgg                           |
| qRT-Circ_TNFRSF21-F  | TGCCAATGAGATTGCAAGGC                            |
| qRT-Circ_TNFRSF21-R  | TTGTGGAAAAAGCAAGGC                              |
| GAPDH-F              | GTAGAGCGGCCGCCATG                               |
| GAPDH-R              | GATTTCCATTGATGACAAAGC                           |
| qRT-U6-F             | TTGGTCTGATCTGGCACAATATAC                        |
| qRT-U6-R             | AAAAATATGGAGCGCTTCAAG                           |
| qRT-TNFRSF21-F1      | tccccggttcagccatgggg                            |
| qRT-TNFRSF21-R1      | tctgttctggtgagctgtg                             |
| qRT-TNFRSF21-F2      | tagegccctg cggcagcacc                           |
| qRT-TNFRSF21-R2      | ggetaagcgggctggggctca                           |
| miR-1227 mimic       | GACCCCUUUUCCCAACGUGC                            |
| miR-1227 Scramble    | CTGACACUTCA GACCCCCCTA                          |
