# Supplementary material for: circTNFRSF21, a newly identified circular RNA promotes endometrial carcinoma pathogenesis through regulating miR-1227-MAPK13/ATF2 axis
Source: PubMed Central journal article supplement (PMC7202486; doi:10.18632/aging.103037), 2020-04-16
Supplement: aging-12-103037-s002..pdf [file aging-12-103037-s002..pdf]

SUPPLEMENTARY FIGURE

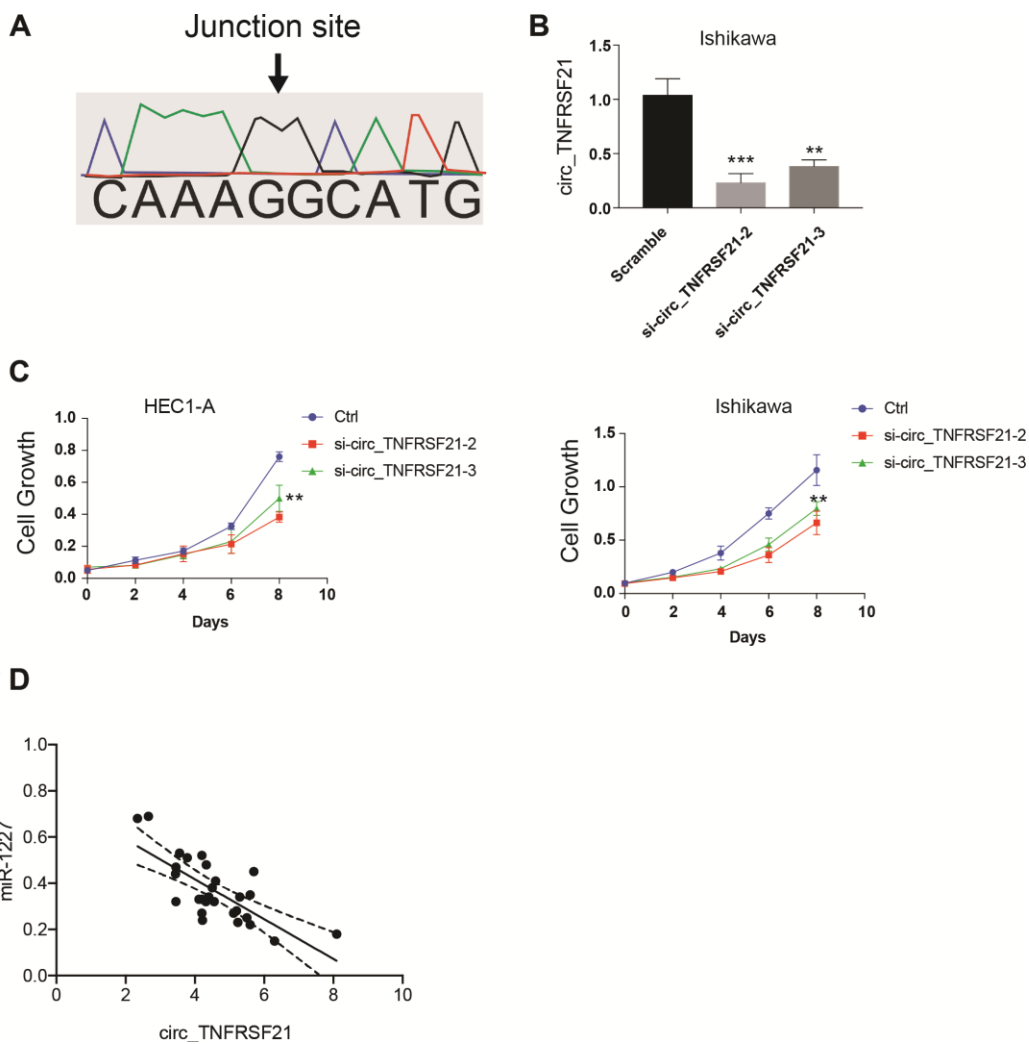

**Supplementary Figure 1.** (A) Sanger sequencing results of circ\_TNFRSF21. The junction site was indicated with black arrow. (B) Two siRNAs targeting circ\_TNFRSF21 greatly decreased circ\_TNFRSF21 expression. (C) EC cell growth after silencing circ\_TNFRSF21 by using siRNAs. (D) The correlation analysis of circ\_TNFRSF21 and miR-1227 expression in EC patients.
